# Supplementary material
Source: MDPI journal article supplement (https://www.mdpi.com/2079-9284/6/3/51)
Supplement: s1 [file s1 › cosmetics-570150-SI.pdf]

## Supplementary Information

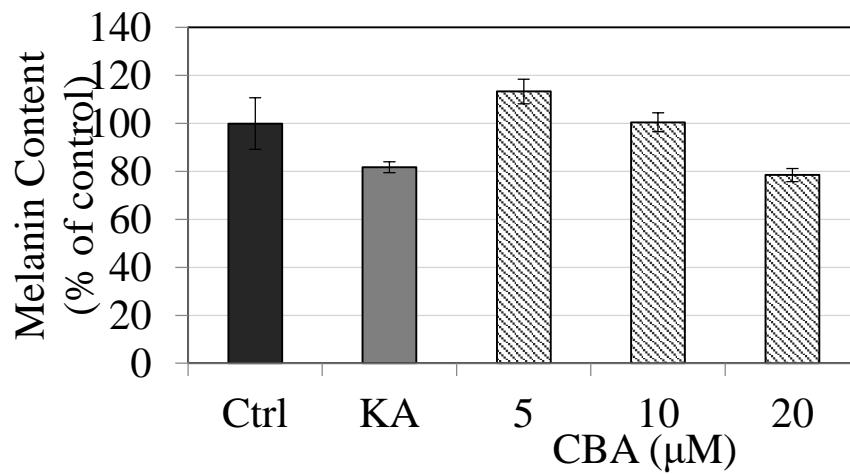

**Figure S1.** Basal (unstimulated) melanogenesis in B16F10 cells treated with CBA at various concentrations in 0.1% DMSO for 48 h quantitated by spectrophotometric method. Kojic acid (KA) was used as a positive control at 500  $\mu$ M. Melanin absorbance were read at 475 nm and normalized by total protein content and relative melanin contents are reported as % of control. Values are mean  $\pm$  SD of triplicate determinations.

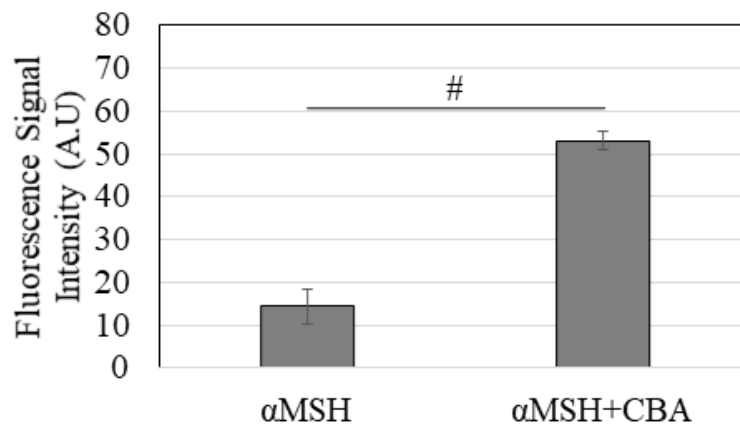

**Figure S2.** Quantification of Fluorescence intensity of LysoTracker red probe. Bar plot shows the  $\alpha$ MSH groups and  $\alpha$ MSH group treated with CBA (20  $\mu$ M). # symbol: significant as compared to  $\alpha$ MSH ( $p=0.0004$ ); students t-test with Welch correction. Data is mean  $\pm$  SD of 4 random microscopic field per condition; with total of at least 200 cells for each condition.
